# Supplementary material for: Phytic acid controlled in situ synthesis of amorphous cobalt phosphate/carbon composite as anode materials with a high mass loading for symmetrical supercapacitor: amorphization of the electrode to boost the energy density
Source: Royal Society of Chemistry journal article supplement (doi:10.1039/d0na00670j), 2020-01-01
Supplement: d0na00670j1.pdf [file d0na00670j1.pdf]

1 **Supplementary information for**

2 **Phytic acid controlled in situ synthesis of amorphous cobalt phosphate/carbon composite**  
3 **as anode materials with a high mass loading for symmetrical supercapacitor:**  
4 **Amorphization of the electrode to boost the energy density**

5 Taewoo Kim,<sup>a</sup> Arjun Prasad Tiwari,<sup>a,b,\*</sup> Kisan Chhetri,<sup>a</sup> Gunendra Prasad Ojha,<sup>a</sup> Hyoju Kim,<sup>a</sup>  
6 Su-Hyeong Chae,<sup>a</sup> Bipeen Dahal,<sup>a</sup> Byoung Min Lee,<sup>c</sup> Tanka Mukhiya,<sup>a</sup> Hak Yong Kim<sup>a,d \*</sup>

7 <sup>a</sup>Department of BIN Convergence Technology, Jeonbuk National University, Jeonju 561-756,  
8 Republic of Korea

9 <sup>b</sup>Carbon Nano Convergence Technology Center for Next Generation Engineers (CNN),  
10 Jeonbuk National University, Jeonju, Republic of Korea

11 <sup>c</sup>Department of Carbon Materials and Fiber Engineering, Jeonbuk National University

12 <sup>d</sup>Department of Organic Materials and Fiber Engineering, Jeonbuk National University,  
13 Jeonju 561-756, Republic of Korea

14 \*Corresponding author: E-mail address: [tiwariarjuna@jbnu.ac.kr](mailto:tiwariarjuna@jbnu.ac.kr)/[tiwariarjuna@gmail.com](mailto:tiwariarjuna@gmail.com)

15 (A.P. Tiwari); [khy@jbnu.ac.kr](mailto:khy@jbnu.ac.kr) (H.Y. Kim)

## 18 **Synthesis of the GC@CoPi-CC**

19 The glucose-derived carbon sample with a CoPi-loaded CC was prepared by a conventional  
20 phosphorization method for comparative study and is referred to as GC@CoPi-CC. Glucose  
21 replaced PA as the carbon precursor, and NaH<sub>2</sub>PO<sub>2</sub> was used as the phosphorus source. Briefly,  
22 metallic Co was attached to the CC by simple carbonization of the CC with cobalt acetate (0.18  
23 mM) at 800 °C under a N<sub>2</sub> atmosphere.<sup>1</sup> Later, the sample was placed into a glucose solution  
24 (0.36 mM) followed by heating (250 °C at 2 °C/minute for 2 h under 40 cm<sup>3</sup>/minute Ar flow)  
25 in a tube furnace along with NaH<sub>2</sub>PO<sub>2</sub> on the upstream side. The resulting sample is referred  
26 to as GC@CoPi-CC. The loading amount of the active material was estimated to be 2 mg cm<sup>-2</sup>.  
27 <sup>2</sup>.

## 28 **Physicochemical characterization**

29 The morphologies of the CCs after active material loading were evaluated by field emission  
30 scanning electron microscopy (FESEM) and high resolution transmission electron microscopy  
31 (HRTEM, JEM-2100F, Japan). To study the crystallinity of the materials, X-ray diffraction  
32 (XRD, Rigaku Co., Japan) was used at 100 kV. X-ray photoelectron spectrometry (Thermo  
33 Scientific ESCALAB 250Xi, USA) with Al K $\alpha$  radiation ( $\lambda = 8.34 \text{ \AA}$ ) as the excitation source  
34 was employed to study the surface elements of the samples. N<sub>2</sub> adsorption and desorption  
35 isotherm analyses were conducted on a Quantachrome Autosorb-iQ sorption analyzer at liquid  
36 N<sub>2</sub> temperature, and the specific surface area was calculated by using the Brunauer-Emmett-  
37 Teller (BET) method. Raman spectra were collected on a confocal laser micro-Raman  
38 spectrometer (Renishaw, UK) with an excitation of 532 nm. The wettability was determined  
39 by measuring the contact angles on a contact angle analyzer (GBX, Digidrop, France) by  
40 dropping 2  $\mu$ L of deionized water onto the surfaces of the CCs.

42 **Supplimentary results**

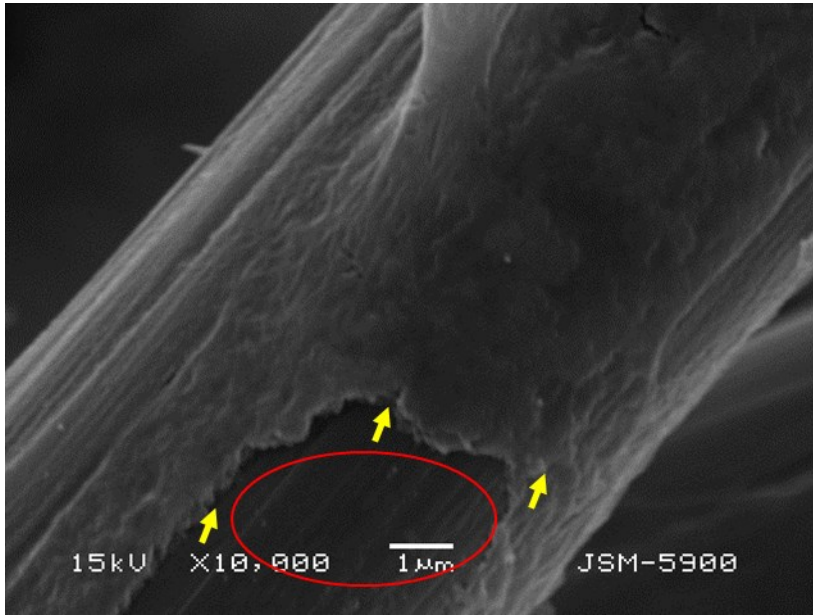

43

44 **Figure S1.** SEM image of an individual fiber of a-PC@CoPi-CC. Arrows showing the CoPi/C  
45 layer while the red circle shows the part of CC after removing the coated layer.

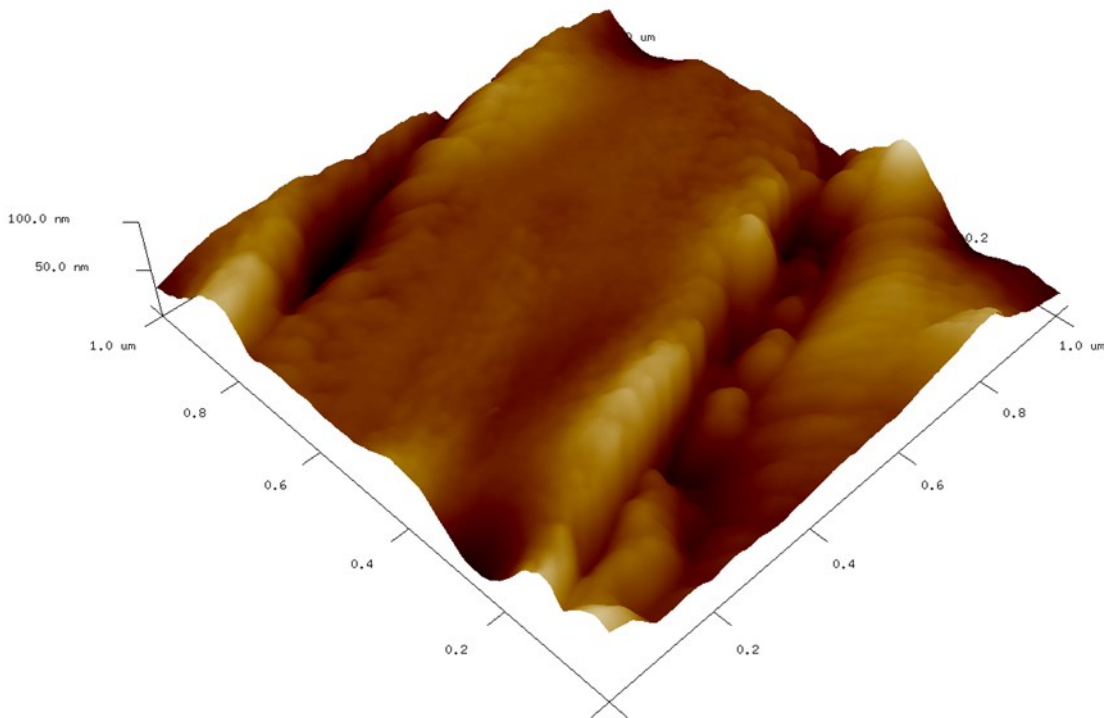

46

47 **Figure S2.** AFM image of the a-PC@CoPi-CC8.

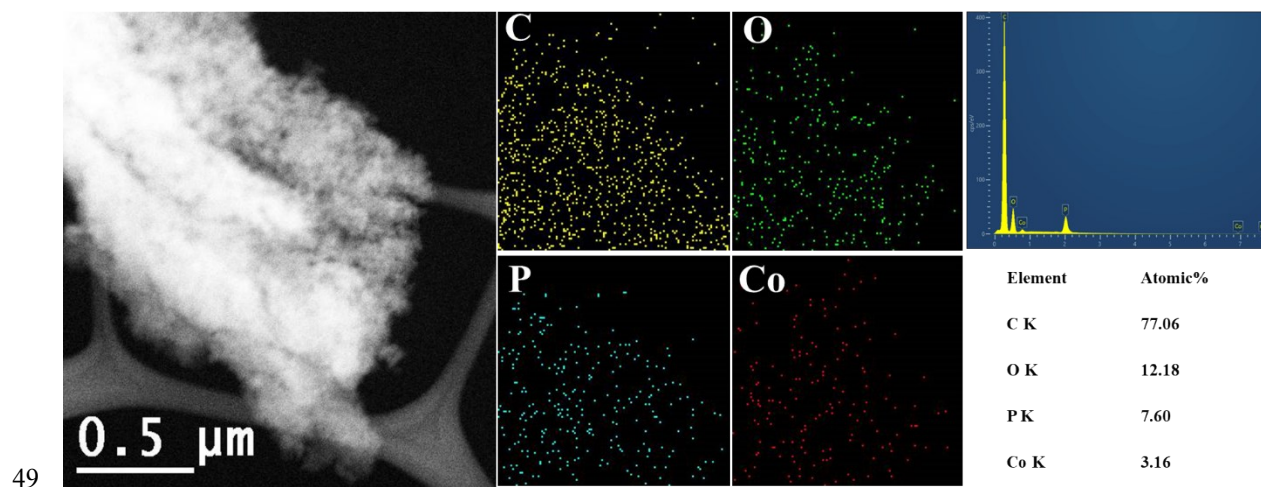

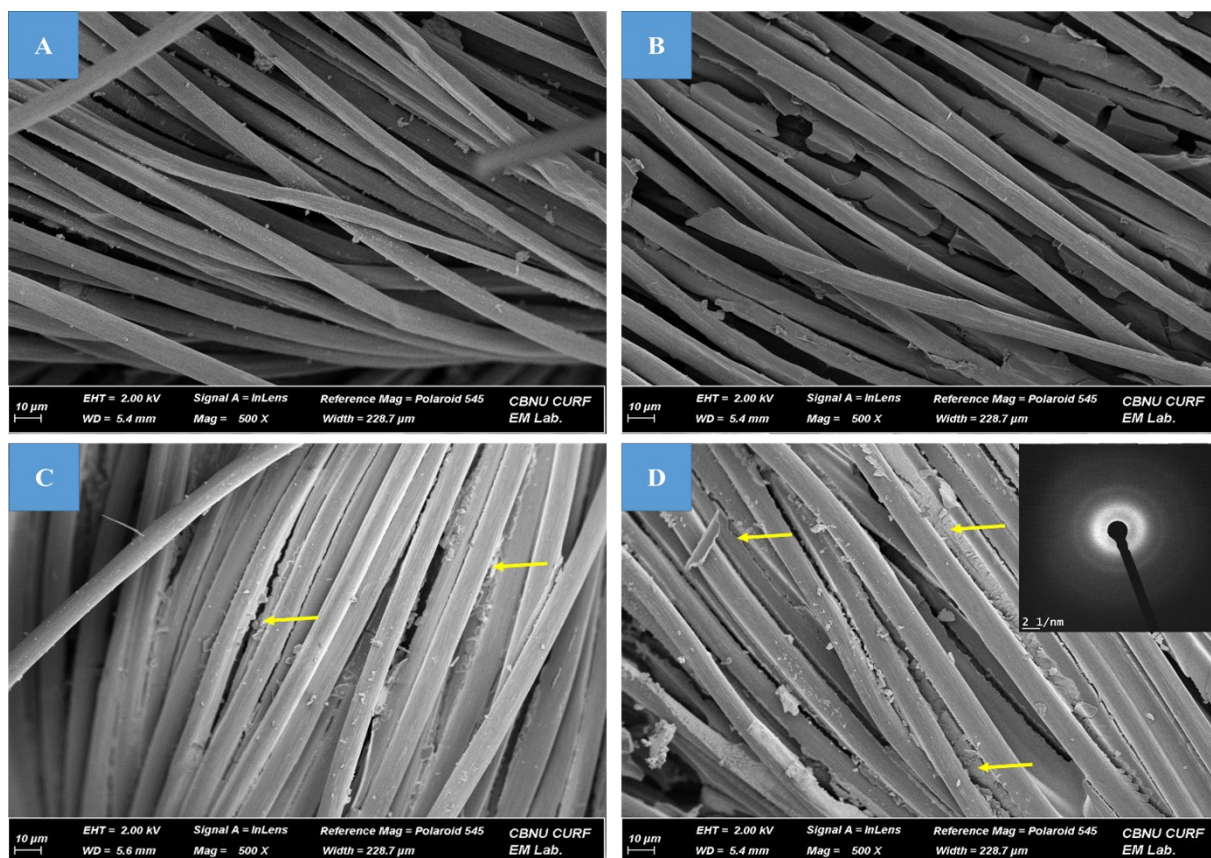

53

54 **Figure S4.** FE-SEM images of the *a*-PC@CoPi-CC2 (A), *a*-PC@CoPi-CC5 (B),  
 55 PC@CoPi-CC8 (C), and *a*-PC@CoPi-CC12 (D). The inset of 'D' shows the TEM-SAED of *a*-  
 56 PC@CoPi-CC12 sample.

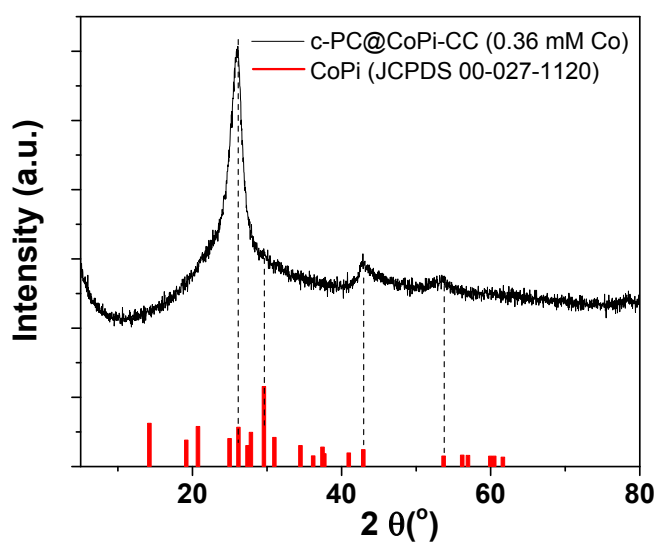

57

58 **Figure S5.** XRD spectrum of a sample prepared from the cobalt acetate of 0.36 mM.

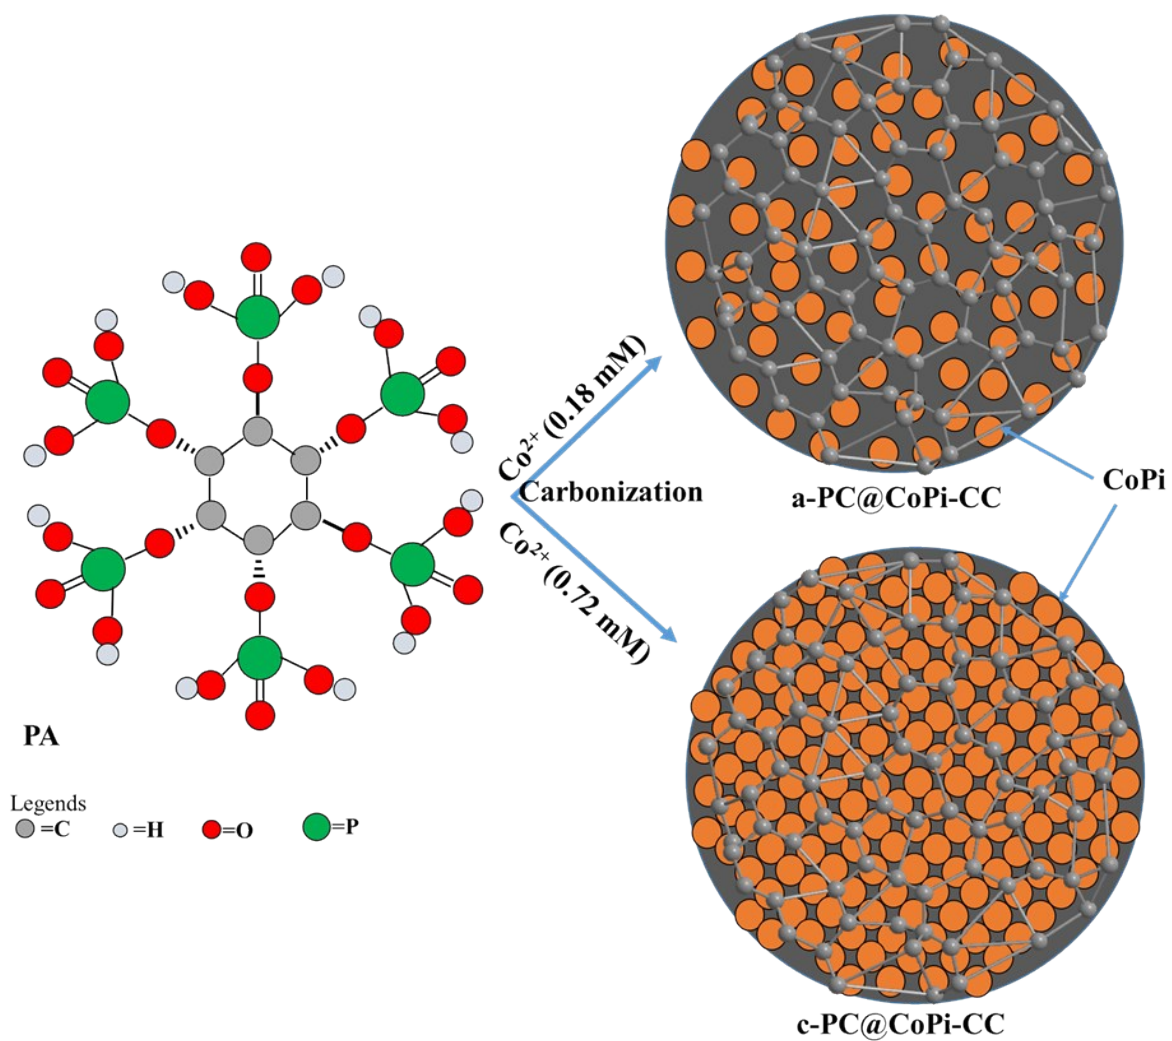

60

61 **Figure S6.** Schematic illustration of conditions showing the synthesis of amorphous (a-  
 62 PC@CoPi-CC) and crystalline (c-PC@CoPi-CC) samples.

63

64

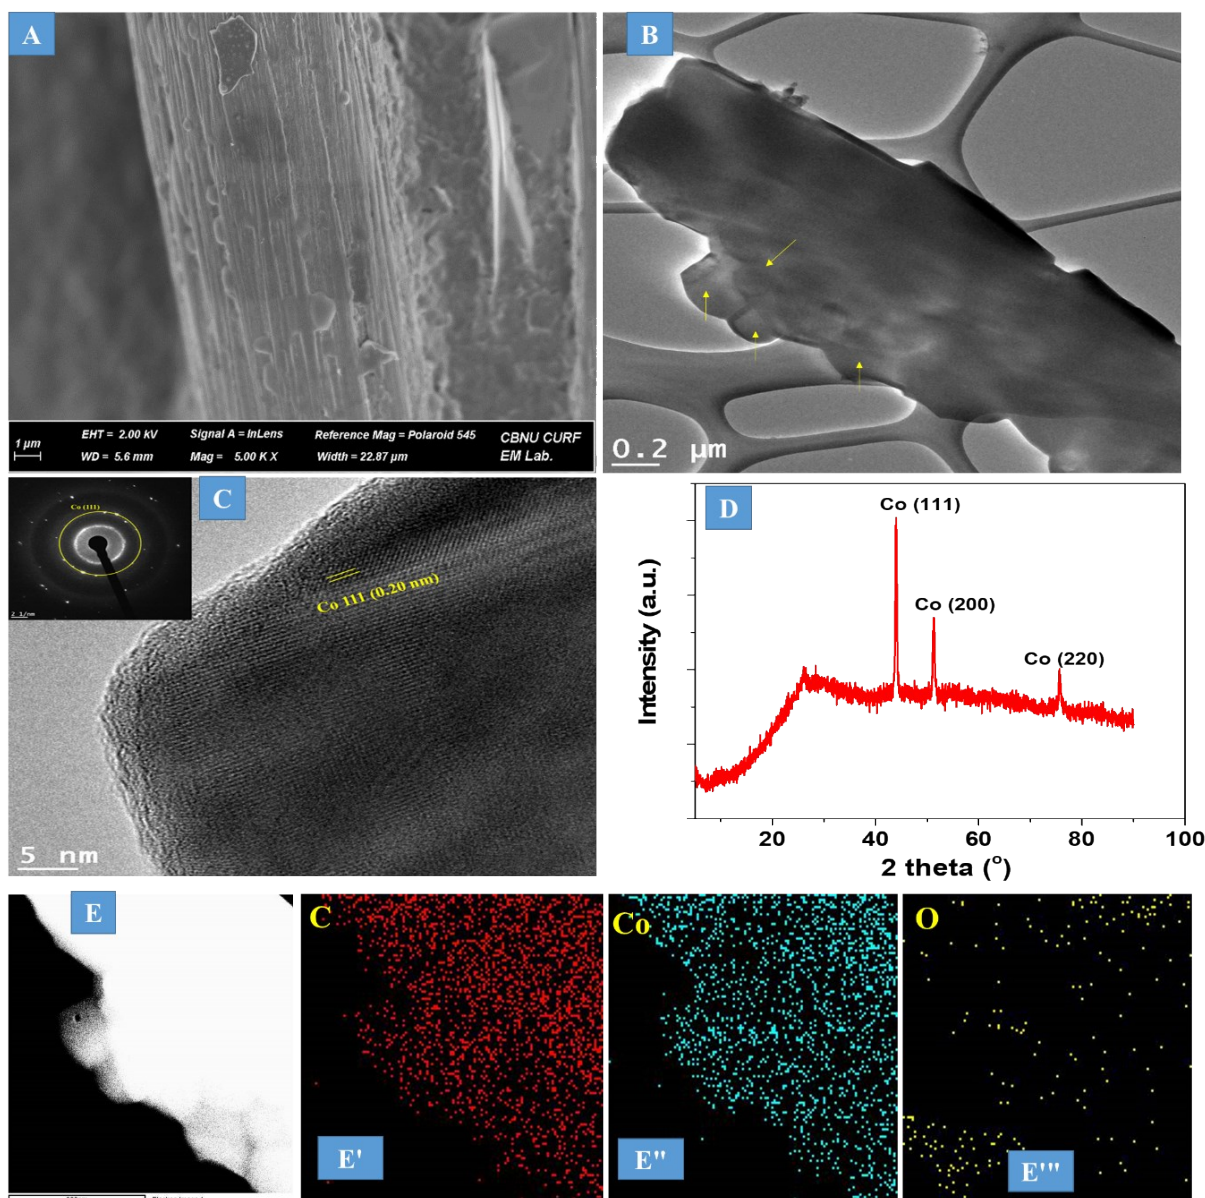

65

66 **Figure S7.** FE-SEM image (A), TEM image (B-C), arrows of B show the particles attached to  
 67 the carbon fiber. SAED pattern of corresponding TEM image (inset of C), XRD spectrum (D),  
 68 and STEM image and its corresponding elemental mapping images (E) of GC@Co-CC.

69 The FESEM image shows that the particles were deposited on the carbon fiber (**Figure**  
 70 **S7A**). The HRTEM image further confirms that particles of 100-300 nm in diameter adhered to  
 71 the substrate (**Figure S7B**). The crystal planes (111) with a d-spacing of 0.20 nm can be directly  
 72 observed (**Figure S7C**). The corresponding SAED pattern also matched well with the HRTEM  
 73 d-spacing data. The XRD pattern for the GC@Co-CC exhibits peaks at  $44.0^\circ$  ((111) plane),

74 51.3° ((200) plane) and 76.1° ((220) plane) that correspond to crystalline cobalt (**Figure S7D**).

75 The EDX mapping images of the HRTEM images are shown in Figure S7E.

76

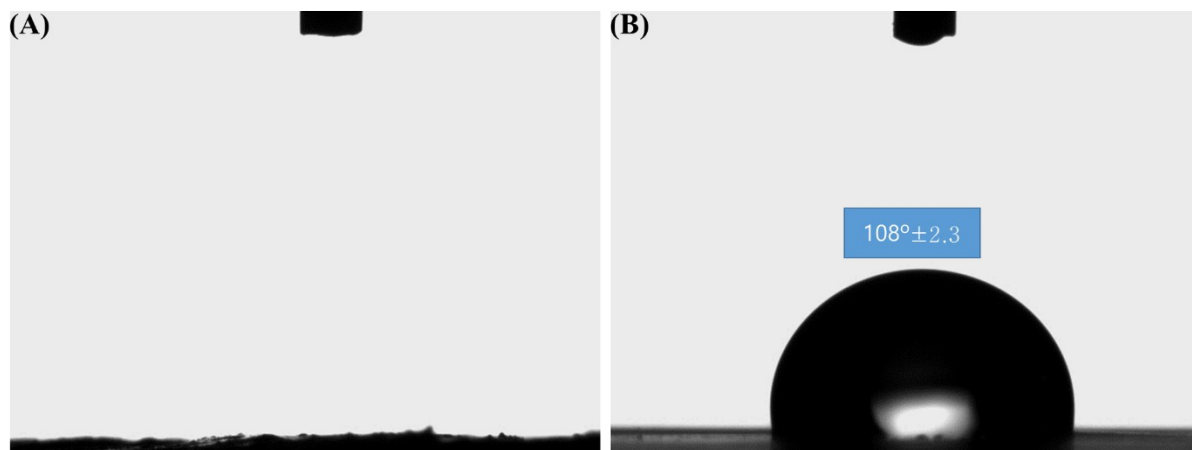

77

78

79 **Figure S8.** The contact angle of CC with PA/ethanol (1:1) (A) Water/ethanol (1:1) (B). ‘A’

80 condition was applied to make phytic acid-derived structures (*a*-PC@CoPi-CC) while ‘B’

81 was to the synthesis of GC@Co-CC and GC@CoPi-CC.



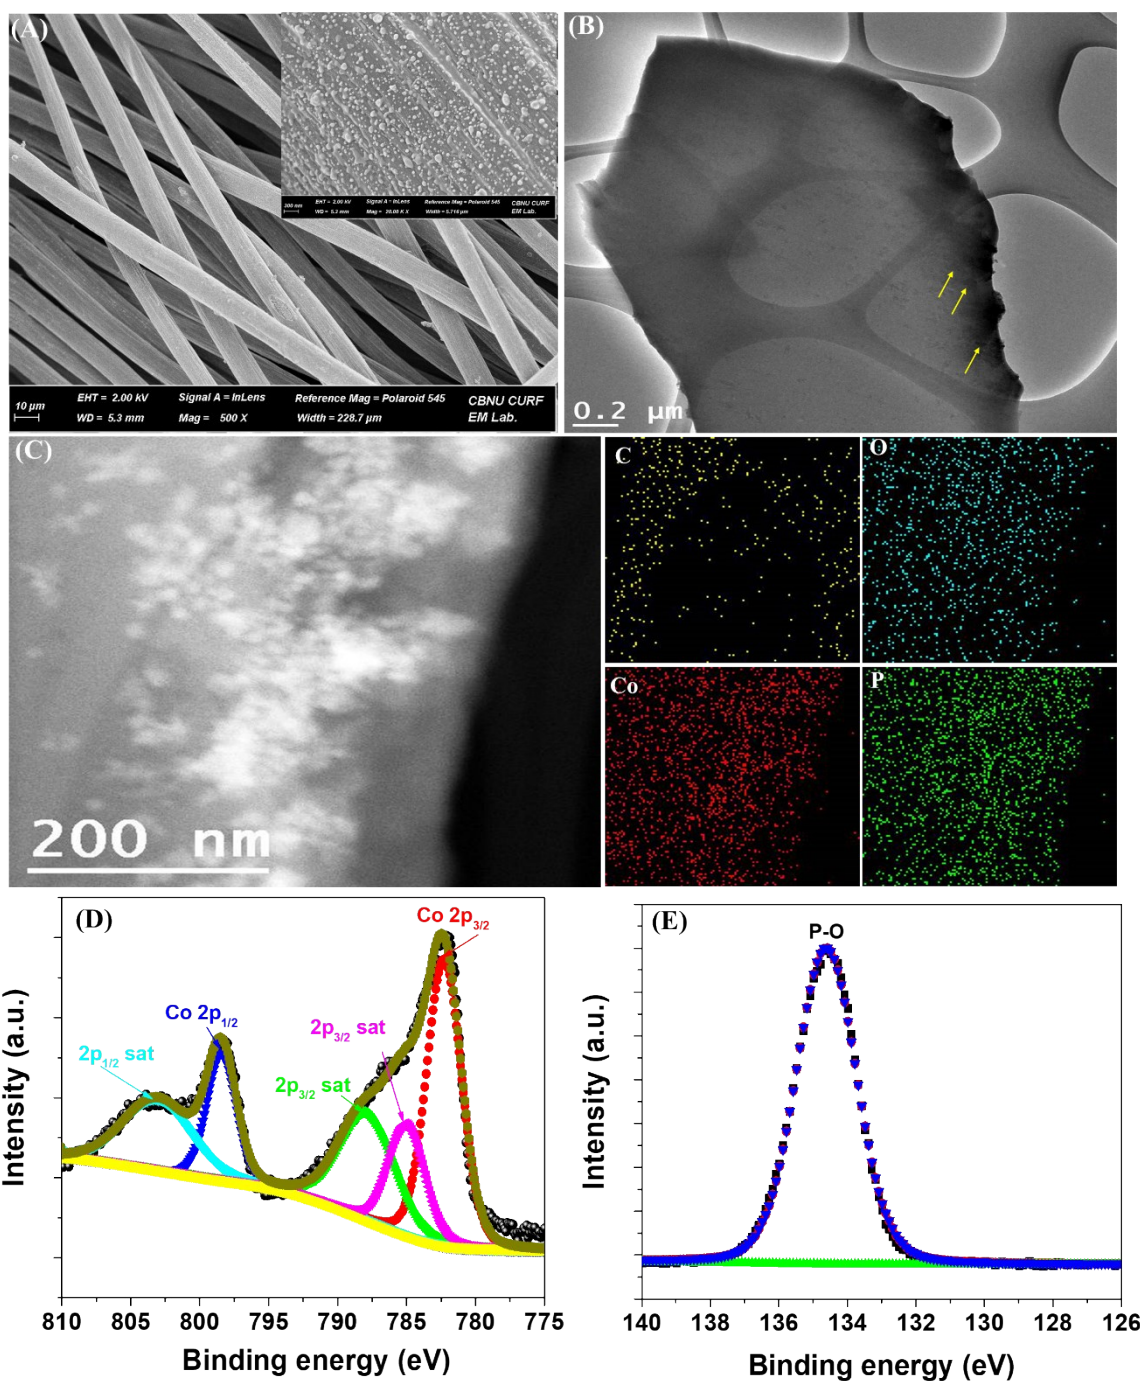

82

83 **Figure S9.** FESEM image (A), HR-TEM-image, arrows show the particles (B), STEM image,  
 84 and corresponding elemental mapping images (C). STEM image analysis revealed the  
 85 presence of all expected major elements, namely, C, O, Co, and P. XPS spectrum of GC@CoPi-  
 86 CC (D,E). High-resolution XPS spectra of Co 2p show peaks centered at 782.3 and 798.4 eV  
 87 are attributed to Co 2p<sub>3/2</sub> and Co 2p<sub>1/2</sub>, respectively of oxidized cobalt.<sup>2</sup> The binding energy  
 88 located at 134.6 eV can be ascribed to the +5 state for all P atoms in the product P 2p.<sup>3</sup>

89 Therefore, the XPS analysis confirms the formation of cobalt phosphate. According to XPS  
90 data, the atomic wt% of C, O, P, and Co are found 57.07, 29.23, 10.33, and 3.37%, respectively.

91

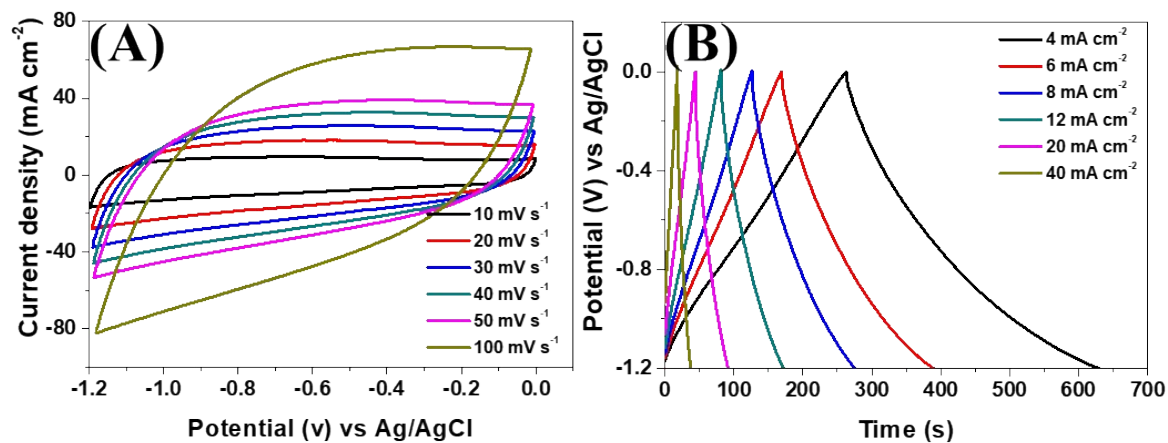

92

93 **Figure S10.** CV (A), and GCD (B) curves of the a-PC@CoPi-CC2.

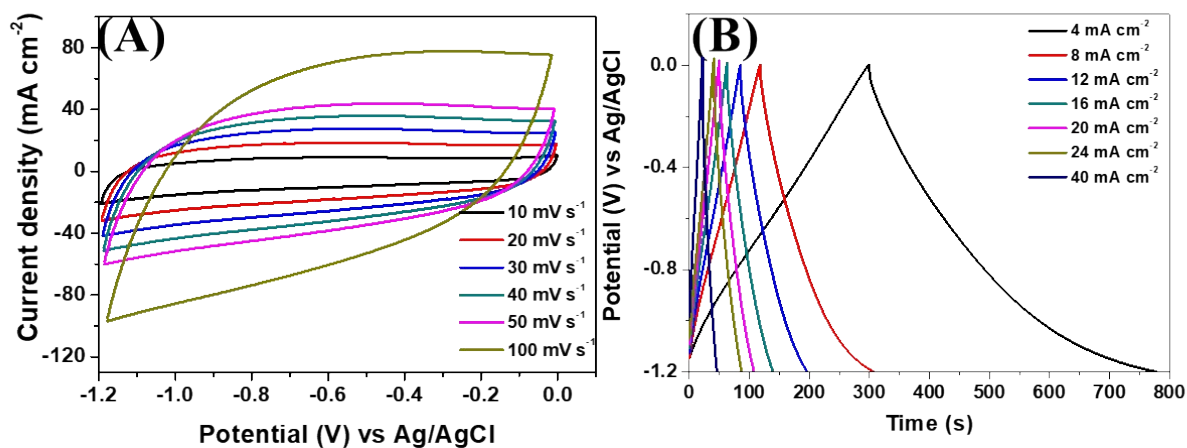

94

95 **Figure S11.** CV (A), and GCD (B) curves of the a-PC@CoPi-CC5.

96

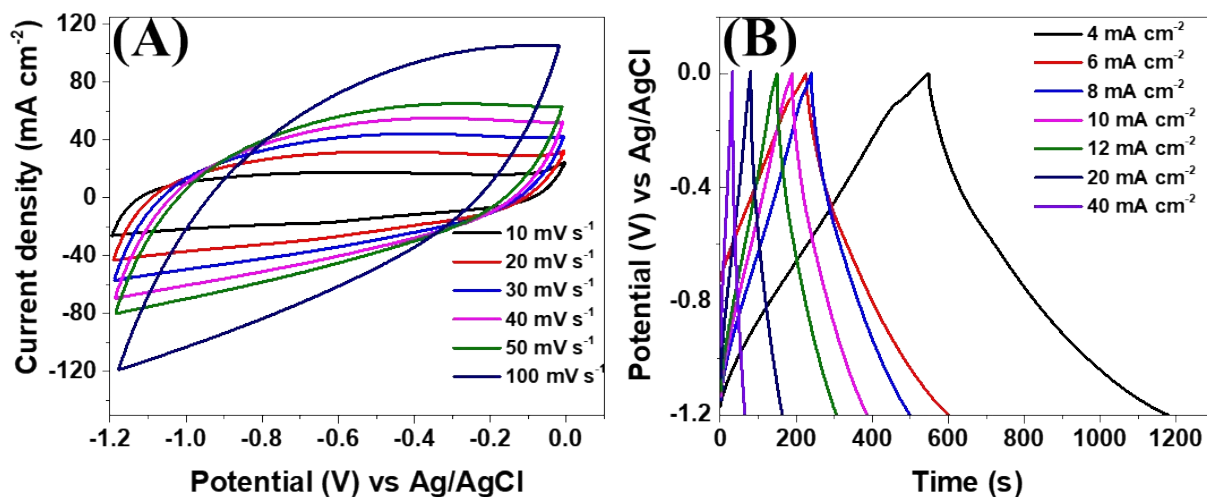

97

98 **Figure S12.** CV (A), and GCD (B) curves of the *a*-PC@CoPi-CC12.

99

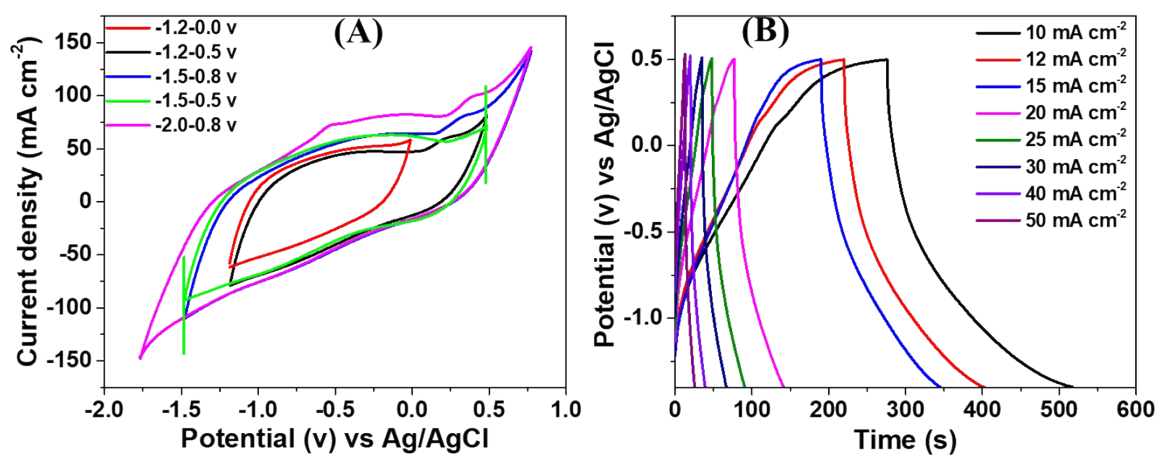

100

101 **Figure S13.** CV curves of *a*-PC@CoPi-CC8 at the different potential window at 50

102  $mV s^{-1}$  (A) and GCD curves of the same sample at different current densities at

103 potential ranges from -1.4 to 0.5 (B).

104

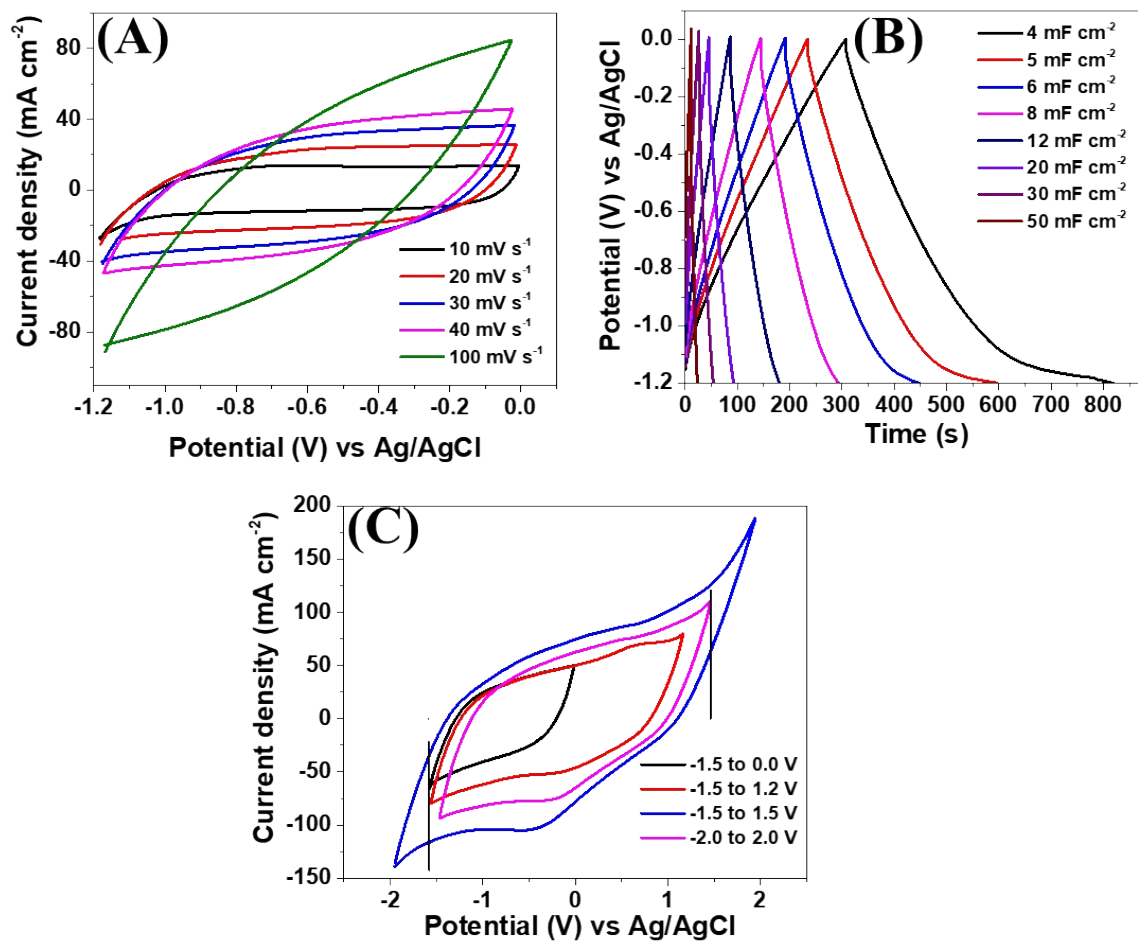

105

106 **Figure S14.** CV (A), GCD (B) curves of a-PC@CoPi-CC8 in 1 M Na<sub>2</sub>SO<sub>4</sub> and CV curves  
 107 showing the maximum possible working potential window ranges of a-PC@CoPi-CC8 in a 1  
 108 M Na<sub>2</sub>SO<sub>4</sub> (C).

109

110

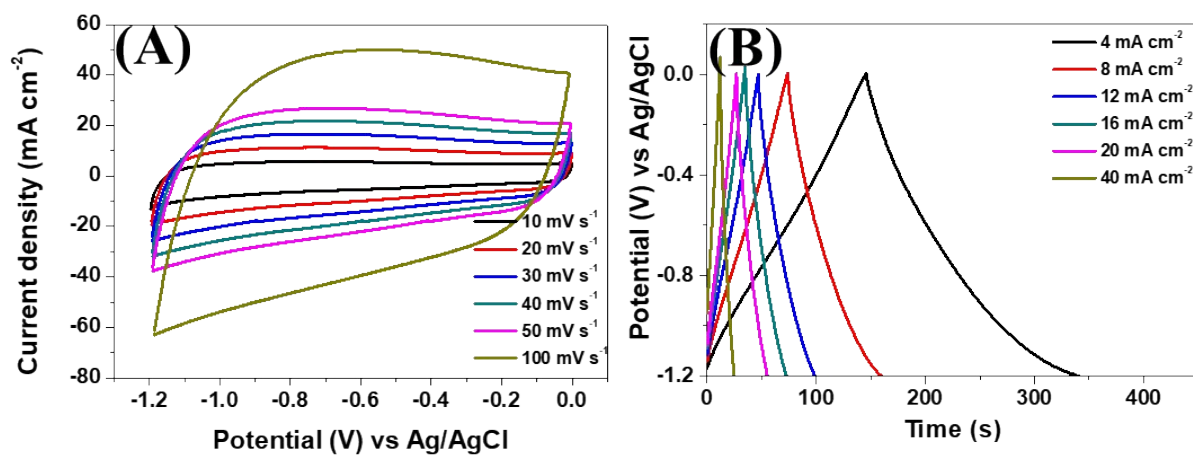

111

112

113 **Figure S15.** CV (A), and GCD (B) curves of PC@CC. The loading amount is estimated to be  
114 5 mg cm<sup>-2</sup>.

115

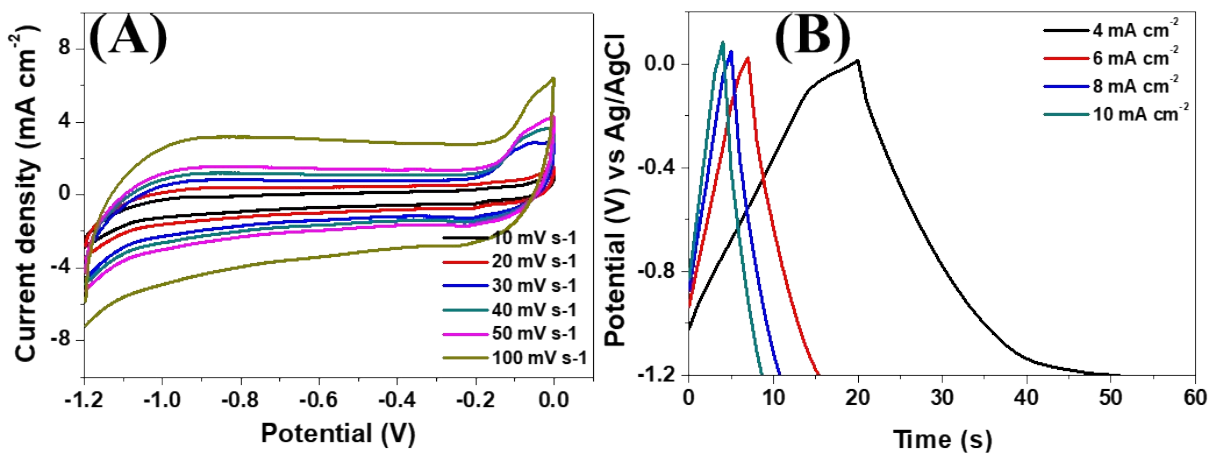

116

117 **Figure S16.** CV (A) and GCD (B) curves of GC@Co-CC. The loading amount is estimated to  
118 be 2 mg cm<sup>-2</sup>.

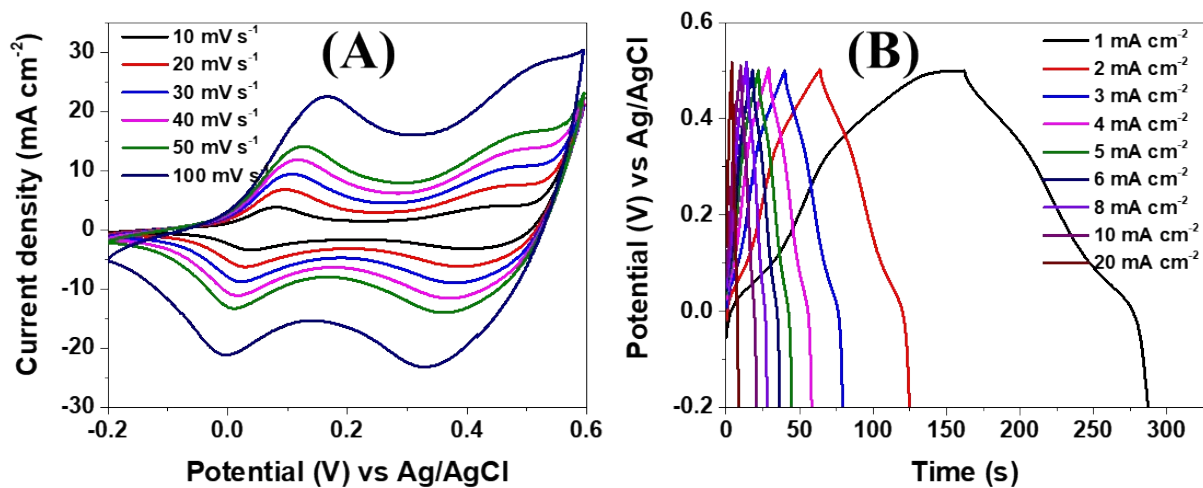

119

120 **Figure S17.** CV (A) and GCD (B) curves of GC@CoPi-CC. The loading amount is estimated

121 to be  $2 \text{ mg cm}^{-2}$ .

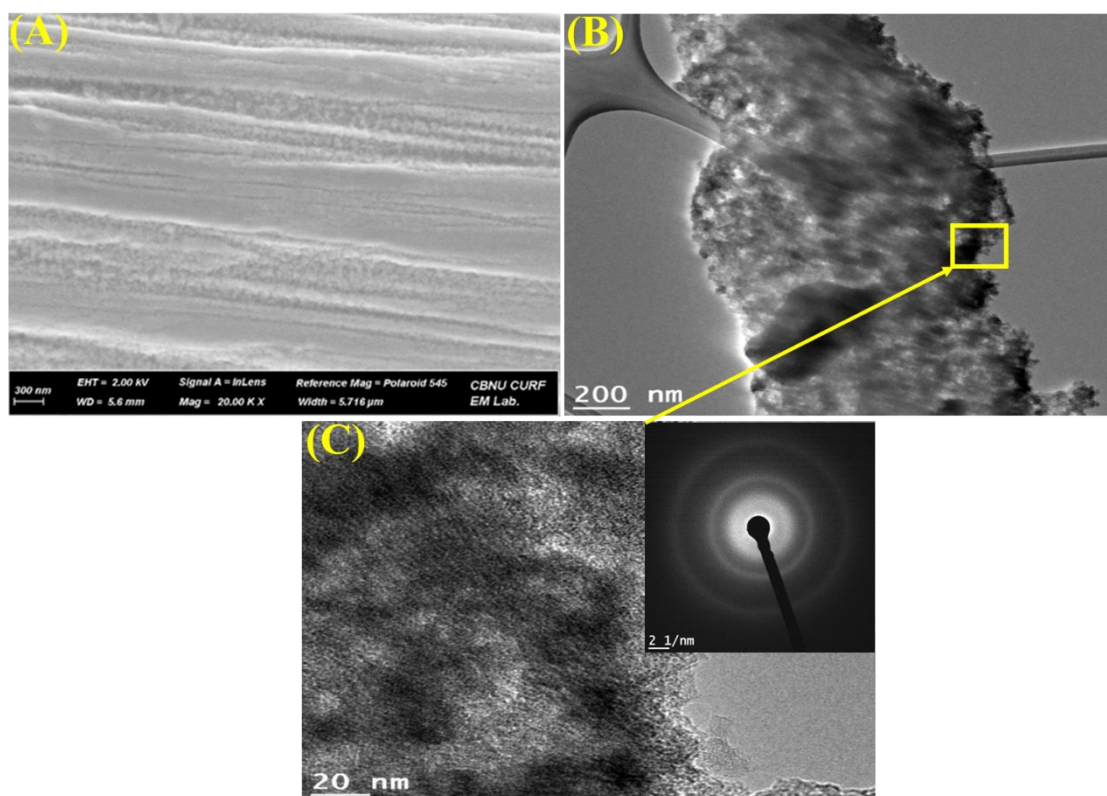

122

123 **Figure S18.** SEM image (A), TEM images of a-PC@CoPi-CC8 after the cyclic stability test

124 (B, C). Inset (C) shows the SAED pattern of the corresponding TEM image.

125

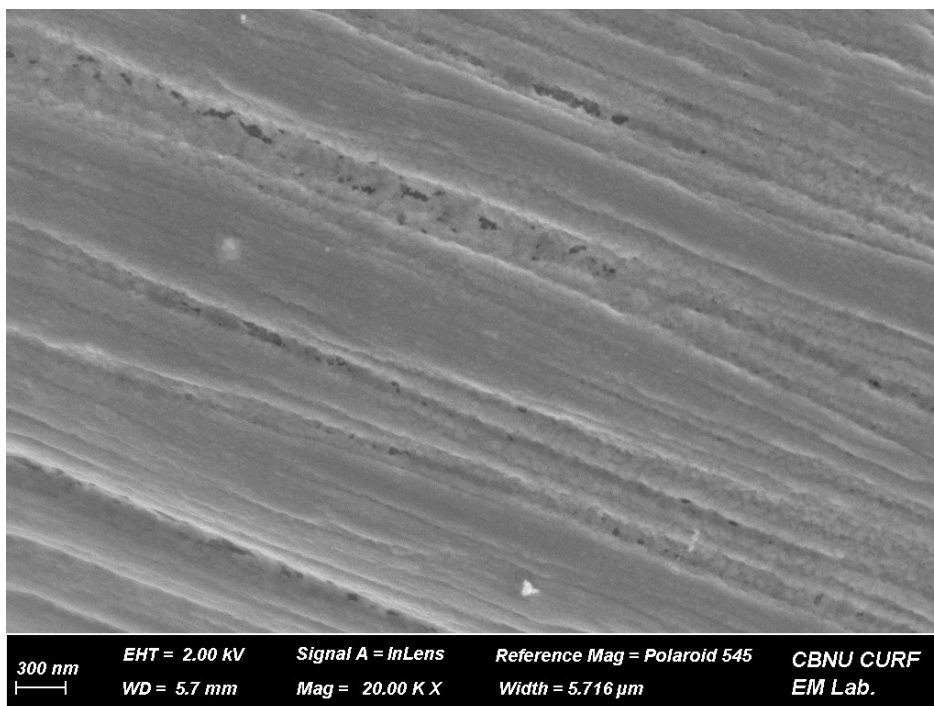

126

127 **Figure S19.** SEM image of the a-PC@CoPi-CC8 after 30 min of sonication.

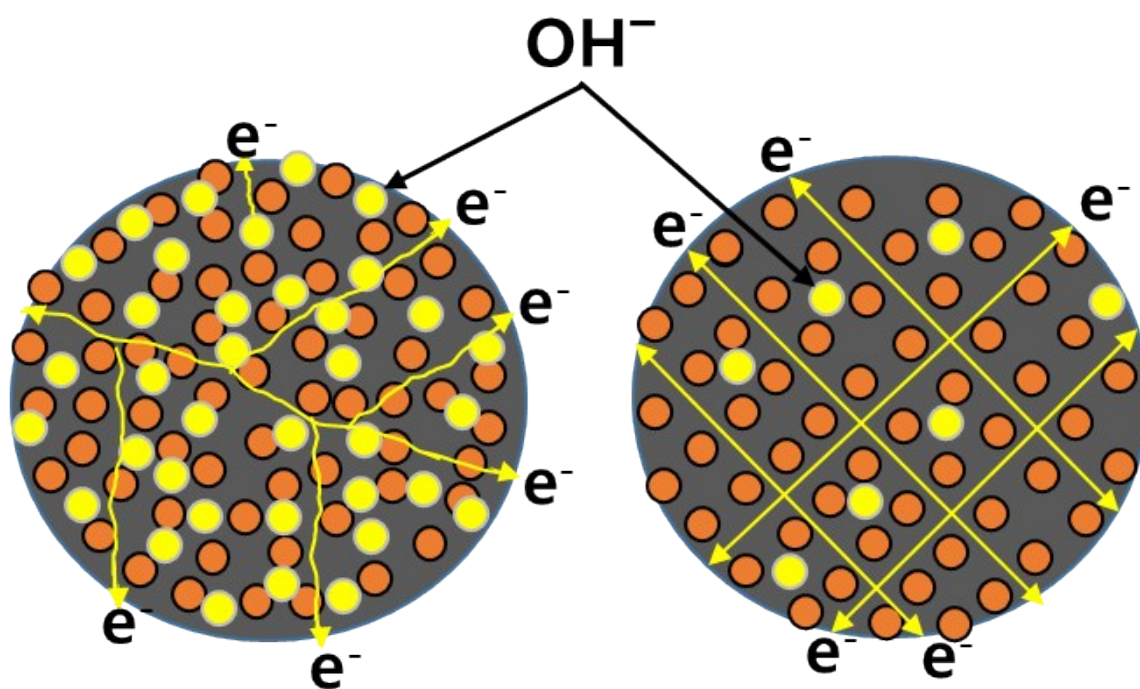

128

129 **Figure S20.** The illustration shows the difference in the ion storage pattern and electron  
 130 transfer from the amorphous (left) and crystalline (right) CoPi/C composite.

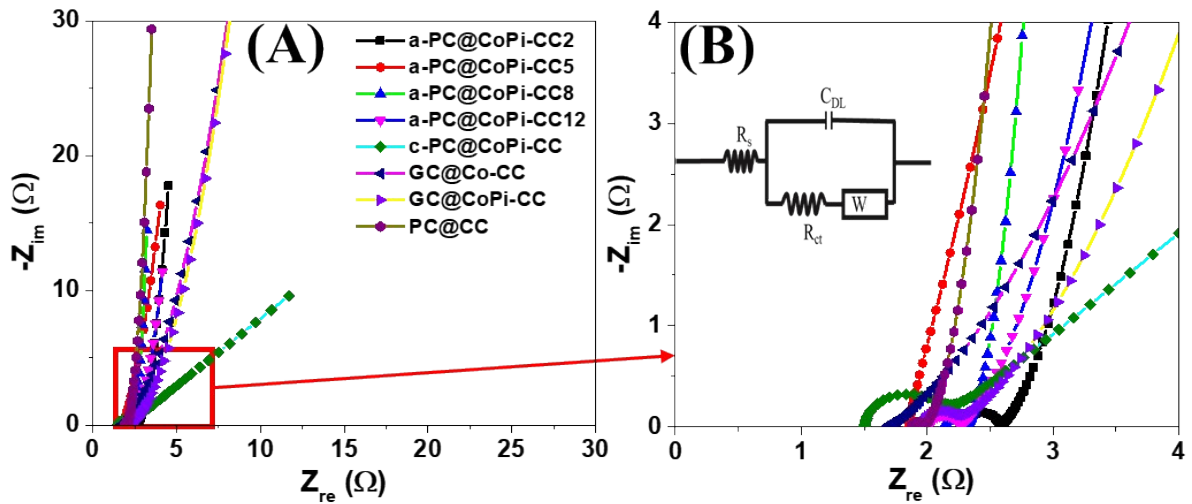

131

132 **Figure S21.** Nyquist plots of different samples (A, B). In figure B, Nyquist plots of

133 Samples are magnified. Equivalent circuit model was used to fit the EIS spectra in

134 the inset of B. ESR circuit is belongs to a-PC@CoPi-CC8.

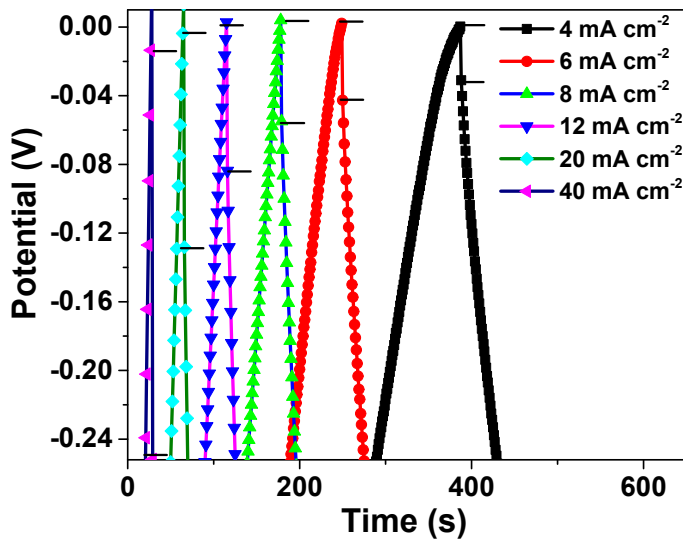

135

136 **Figure S22.** iR drop evaluation of a-PC@CoPi-CC8.

137



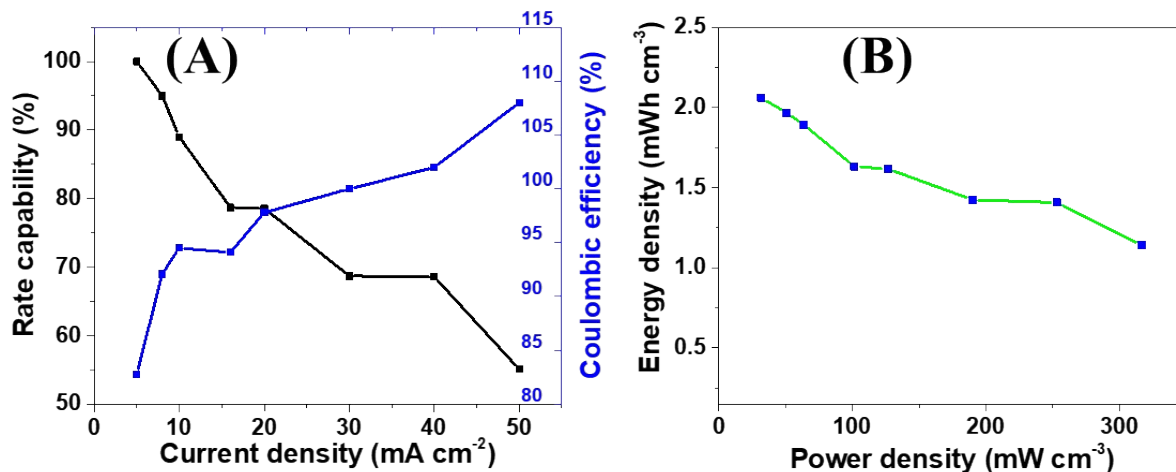

138

139 **Figure S23.** Areal rate capability and coulombic efficiency of SSC device (A) and the graph  
 140 showing volumetric energy density vs power density of SSC device.

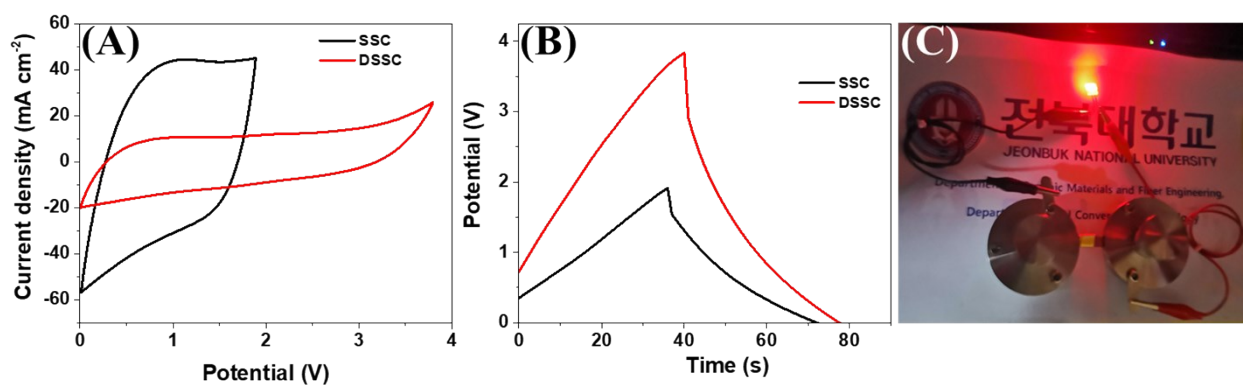

141

142 **Figure S24.** CV profiles of SSC and DSSC collected at 50 mV s<sup>-1</sup> (A), GCD curves of SSC and  
 143 DSSC device collected at 20 mA cm<sup>-2</sup> (B) and image of a red LED powered by two SSC  
 144 supercapacitors in series. The supercapacitor devices were charged in around 40 s before LED  
 145 tests.

146

147

148

149

150

151 **Table S1.** Comparison of areal capacitance, stability, and rate capability values of different  
 152 electrode materials studied in this work.

| <b>Electrode materials</b> | <b>Current density (mA cm<sup>-2</sup>)</b> | <b>Areal capacitance (F cm<sup>-2</sup>)</b>           | <b>Capacity retention (%) at 10000 cycles</b> | <b>Rate capability (40 mA cm<sup>-2</sup>)</b> |
|----------------------------|---------------------------------------------|--------------------------------------------------------|-----------------------------------------------|------------------------------------------------|
| a-PC@CoPi-CC-2             | 4                                           | 1.21 (606.1 F g <sup>-1</sup> at 1 A g <sup>-1</sup> ) |                                               | 52.1%                                          |
|                            | 6                                           | 1.10                                                   |                                               |                                                |
|                            | 8                                           | 1.00                                                   |                                               |                                                |
|                            | 12                                          | 0.91                                                   |                                               |                                                |
|                            | 20                                          | 0.76                                                   |                                               |                                                |
|                            | 40                                          | 0.63                                                   |                                               |                                                |
| a-PC@CoPi-CC-5             | 4                                           | 1.60 (322.0 F g <sup>-1</sup> at 1 A g <sup>-1</sup> ) |                                               | 56.7%                                          |
|                            | 8                                           | 1.27                                                   |                                               |                                                |
|                            | 12                                          | 1.01                                                   |                                               |                                                |
|                            | 20                                          | 0.96                                                   |                                               |                                                |
|                            | 40                                          | 0.80                                                   |                                               |                                                |
| a-PC@CoPi-                 | 4                                           | 1.99 (248.7 F g <sup>-1</sup> at                       |                                               | 51.8%                                          |

|                     |    |                                                             |  |       |
|---------------------|----|-------------------------------------------------------------|--|-------|
| CC-8                |    | 1 A g <sup>-1</sup> )                                       |  | 94.2% |
|                     | 6  | 1.58                                                        |  |       |
|                     | 8  | 1.44                                                        |  |       |
|                     | 12 | 1.30                                                        |  |       |
|                     | 20 | 1.13                                                        |  |       |
|                     | 40 | 1.05                                                        |  |       |
| a-PC@CoPi-<br>CC-12 | 4  | 2.15 (179.5 F g <sup>-1</sup> at<br>1 A g <sup>-1</sup> )   |  | 50.8% |
|                     | 6  | 1.87                                                        |  |       |
|                     | 8  | 1.71                                                        |  |       |
|                     | 10 | 1.62                                                        |  |       |
|                     | 12 | 1.54                                                        |  |       |
|                     | 20 | 1.33                                                        |  |       |
|                     | 40 | 1.08                                                        |  |       |
| PC@CC               | 4  | 0.64 (128.6 F g <sup>-1</sup> at<br>1.2 A g <sup>-1</sup> ) |  | 62.5% |
|                     | 8  | 0.57                                                        |  |       |
|                     | 12 | 0.51                                                        |  |       |
|                     | 20 | 0.47                                                        |  |       |

|                       |    |      |      |       |
|-----------------------|----|------|------|-------|
|                       | 40 | 0.40 |      |       |
| c-PC@CoPi-<br>CC      | 4  | 0.54 |      |       |
|                       | 6  | 0.63 |      |       |
|                       | 8  | 0.57 | ~76% |       |
|                       | 10 | 0.56 |      |       |
|                       | 12 | 0.55 |      |       |
|                       | 20 | 0.52 |      |       |
|                       | 25 | 0.45 |      |       |
| GC@CoPi-CC<br>(No PA) | 1  | 0.25 |      | 64%   |
|                       | 2  | 0.25 |      |       |
|                       | 3  | 0.24 |      |       |
|                       | 4  | 0.23 |      |       |
|                       | 6  | 0.21 |      |       |
|                       | 8  | 0.20 |      |       |
|                       | 10 | 0.20 |      |       |
|                       | 20 | 0.16 |      |       |
| GC@Co-CC              | 4  | 0.10 |      | 33.3% |
|                       | 6  | 0.08 |      |       |

|  |    |      |  |  |
|--|----|------|--|--|
|  | 8  | 0.07 |  |  |
|  | 10 | 0.06 |  |  |

153

154 **Table S2.** Comparison with the capacitance reported in the literature.

| S. N. | Electrode materials               | Specific capacity/capacitance                                                                      | Electrolyte used                      | Use of binder | Stability (cycles)                 | Ref.             |
|-------|-----------------------------------|----------------------------------------------------------------------------------------------------|---------------------------------------|---------------|------------------------------------|------------------|
| 1     | PC@CoPi-CC2                       | 1.21 F cm <sup>-2</sup> at 4 mA cm <sup>-2</sup> (606.1 F g <sup>-1</sup> at 1 A g <sup>-1</sup> ) | 2 M KOH                               | Binder free   |                                    | <b>This work</b> |
| 2     | PC@CoPi-CC5                       | 1.60 F cm <sup>-2</sup> at 4 mA cm <sup>-2</sup> (322.0 F g <sup>-1</sup> at 1 A g <sup>-1</sup> ) | 2 M KOH                               | Binder free   |                                    | <b>This work</b> |
| 3     | PC@CoPi-CC8                       | 1.99 F cm <sup>-2</sup> at 4 mA cm <sup>-2</sup> (248.7 F g <sup>-1</sup> at 1 A g <sup>-1</sup> ) | 2 M KOH                               | Binder free   | 94.2% (10000)                      | <b>This work</b> |
| 4     | Porous carbon nanofibers (P-CNFs) | 104 F g <sup>-1</sup> (0.2 A g <sup>-1</sup> )                                                     | 1 M (H <sub>2</sub> SO <sub>4</sub> ) | Binder free   | 94% at 10 A g <sup>-1</sup> (2000) | <sup>4</sup>     |
| 5     | MnO <sub>2</sub> /RGO/CF//GH      | 171 F cm <sup>-2</sup> (0.5                                                                        | 1.0 M                                 | Binder        |                                    | <sup>5</sup>     |

|    |                                                      |                                                                                                      |                                       |             |                                       |               |
|----|------------------------------------------------------|------------------------------------------------------------------------------------------------------|---------------------------------------|-------------|---------------------------------------|---------------|
|    | /CW                                                  | mA cm <sup>-2</sup> )                                                                                | Na <sub>2</sub> SO <sub>4</sub>       | r free      |                                       |               |
| 6  | PPy-Mxene composite                                  | 326.1 F g <sup>-1</sup> at 0.1 A g <sup>-1</sup> or 1.64 F cm <sup>-2</sup> at 1 mA cm <sup>-2</sup> | 0.5 M H <sub>2</sub> SO <sub>4</sub>  | Binder free | >95% at 50 mV s <sup>-1</sup> (30000) | <sup>6</sup>  |
| 7  | PA assisted PANI gel                                 | 450 F g <sup>-1</sup> at 0.5 A g <sup>-1</sup>                                                       | 1 M H <sub>2</sub> SO <sub>4</sub>    | Binder free | 83% (1000)                            | <sup>7</sup>  |
| 8  | Fe <sub>2</sub> O <sub>3</sub> /PPy nanoarrays on CC | 382.4 mF cm <sup>-2</sup> (0.5 mA cm <sup>-2</sup> )                                                 | 1 M Na <sub>2</sub> SO <sub>4</sub>   | Binder free | 97.2 % (5000)                         | <sup>8</sup>  |
| 9  | Fe-P@CC                                              | 362 mF cm <sup>-2</sup> at 1.2 mA cm <sup>-2</sup>                                                   | 3 M KOH                               | Binder free | 95% (10000)                           | <sup>9</sup>  |
| 10 | P doped TiO <sub>2</sub>                             | 254 mF cm <sup>-2</sup>                                                                              | 0.5 M Na <sub>2</sub> SO <sub>4</sub> | Binder free | 63% (10000)                           | <sup>10</sup> |
| 11 | CoP/carbon                                           | CoP@C (349.2 F g <sup>-1</sup> at 1 A g <sup>-1</sup> )                                              | 3 M KOH                               | Binder free | -                                     | <sup>11</sup> |
| 12 | Fe/Fe <sub>3</sub> O <sub>4</sub>                    | 20.8 mF cm <sup>-2</sup> (10mV s <sup>-1</sup> )                                                     | 3 M LiCl                              | Binder free | 91.7% (2500)                          | <sup>12</sup> |

|    |                                                  |                                                                                 |                          |                 |                  |               |
|----|--------------------------------------------------|---------------------------------------------------------------------------------|--------------------------|-----------------|------------------|---------------|
| 13 | Fe <sub>2</sub> O <sub>3</sub> @ACC<br>electrode | 2775 mF cm <sup>-2</sup> in<br>between -0.8 and<br>0 V at 1 mA cm <sup>-2</sup> | 3 M<br>LiNO <sub>3</sub> | Binde<br>r free | 95%<br>(4000)    | <sup>13</sup> |
| 13 | Ni <sub>2</sub> P@CF                             | 1746 mF cm <sup>-2</sup> at 5<br>mA cm <sup>-2</sup>                            | 1 M<br>KOH               | Binde<br>r free | -                | <sup>14</sup> |
| 14 | (N, P-CQDs/rGO)                                  | 453.7 F g <sup>-1</sup> at 1 A g <sup>-1</sup>                                  | 6 M<br>KOH               | Binde<br>r      | 93.5%<br>(10000) | <sup>15</sup> |
| 15 | Fe <sub>3</sub> P <sub>2</sub> O <sub>8</sub>    | 200 F g <sup>-1</sup> at 0.5 A g <sup>-1</sup>                                  | 2 M<br>KOH               | Binde<br>r      | 35.0%<br>(1000)  | <sup>16</sup> |

155

156

157

158

159

160

161

162

163

164

165

166 **Table S3.** Comparison with the  $R_s$ ,  $R_{ct}$  and  $Z_w$  values of different samples including SSC.

| Samples                     | $R_s$ (ohm) | $R_{ct}$ (ohm) | $Z_w$ (ohm) |
|-----------------------------|-------------|----------------|-------------|
| a-PC@CoPi-CC2               | 2.290       | 0.282          | 1.453       |
| a-PC@CoPi-CC5               | 1.857       | 0.001          | 1.003       |
| a-PC@CoPi-CC8               | 2.139       | 0.160          | 3.088       |
| a-PC@CoPi-CC12              | 2.021       | 0.233          | 1.494       |
| c-PC@CoPi-CC                | 1.507       | 0.592          | 0.294       |
| GC@Co-CC                    | 1.691       | 0.056          | 0.093       |
| GC@CoPi-CC                  | 1.962       | 0.288          | 0.354       |
| PC@CC                       | 1.878       | 0.092          | 1.843       |
| SSC device-before stability | 2.204       | 3.058          | 1.150       |
| SSC device-after stability  | 2.065       | 3.475          | 0.078       |

167

## 168 **References**

- 169 1. A. P. Tiwari, S.-H. Chae, G. P. Ojha, B. Dahal, T. Mukhiya, M. Lee, K. Chhetri, T. Kim and H.-Y.  
170 Kim, *Journal of Colloid and Interface Science*, 2019, **553**, 622-630.
- 171 2. Y. Shu, B. Li, J. Chen, Q. Xu, H. Pang and X. Hu, *ACS Applied Materials & Interfaces*, 2018, **10**,  
172 2360-2367.
- 173 3. C. Chen, N. Zhang, Y. He, B. Liang, R. Ma and X. Liu, *ACS Applied Materials & Interfaces*, 2016,  
174 **8**, 23114-23121.
- 175 4. Z. Dou, Z. Qin, Y. Shen, S. Hu, N. Liu and Y. Zhang, *Carbon*, 2019, **153**, 617-624.
- 176 5. Z. Zhang, F. Xiao and S. Wang, *Journal of Materials Chemistry A*, 2015, **3**, 11215-11223.
- 177 6. W. Zhao, J. Peng, W. Wang, B. Jin, T. Chen, S. Liu, Q. Zhao and W. Huang, *Small*, 2019, **15**,  
178 1901351.
- 179 7. L. Pan, G. Yu, D. Zhai, H. R. Lee, W. Zhao, N. Liu, H. Wang, B. C. K. Tee, Y. Shi, Y. Cui and Z. Bao,  
180 *Proceedings of the National Academy of Sciences*, 2012, **109**, 9287.
- 181 8. L. Wang, H. Yang, X. Liu, R. Zeng, M. Li, Y. Huang and X. Hu, *Angewandte Chemie*  
182 *International Edition*, 2017, **56**, 1105-1110.
- 183 9. A. K. Yousef, Y. Kim, P. Bhanja, P. Mei, M. Pramanik, M. M. S. Sanad, M. M. Rashad, A. Y. El-



- 184 Sayed, A. A. Alshehri, Y. G. Alghamdi, K. A. Alzahrani, Y. Ide, J. Lin and Y. Yamauchi, *RSC*  
185 *Advances*, 2019, **9**, 25240-25247.
- 186 10. Y. Zhang, S. Duan, Y. Li, S. Zhang, Y. Wu, M. Ma, C. Tao, Z. Zhang, D. Qin and E. Xie, *Dalton*  
187 *Transactions*, 2020, DOI: 10.1039/C9DT04316K.
- 188 11. J. Gu, L. Sun, Y. Zhang, Q. Zhang, X. Li, H. Si, Y. Shi, C. Sun, Y. Gong and Y. Zhang, *Chemical*  
189 *Engineering Journal*, 2020, **385**, 123454.
- 190 12. L. Guohong, L. Ruchun and Z. Weijia, *Nano-Micro Letters*, 2017, **9**, 46.
- 191 13. J. Li, Y. Wang, W. Xu, Y. Wang, B. Zhang, S. Luo, X. Zhou, C. Zhang, X. Gu and C. Hu, *Nano*  
192 *Energy*, 2019, **57**, 379-387.
- 193 14. P. Sun, M. Qiu, J. Huang, J. Zhao, L. Chen, Y. Fu, G. Cui and Y. Tong, *Chemical Engineering*  
194 *Journal*, 2020, **380**, 122621.
- 195 15. J. Li, X. Yun, Z. Hu, L. Xi, N. Li, H. Tang, P. Lu and Y. Zhu, *Journal of Materials Chemistry A*,  
196 2019, **7**, 26311-26325.
- 197 16. M. Liu, J. Li, W. Han and L. Kang, *Journal of Energy Chemistry*, 2016, **25**, 601-608.

198

199

200

201
